# Supplementary material for: Torsion sensors of high sensitivity and wide dynamic range based on a graphene woven structure
Source: Royal Society of Chemistry journal article supplement (doi:10.1039/c4nr03252g), 2014-01-01
Supplement: c4nr03252g1.pdf [file c4nr03252g1.pdf]

## **Electronic Supplementary Information**

### **High Sensitivity and Wide Dynamic Range Torsion Sensors based on Graphene Woven Structure**

Tingting Yang<sup>1,2</sup>, Yan Wang<sup>3</sup>, Xinming Li<sup>4</sup>, Yangyang Zhang<sup>1</sup>, Xiao Li<sup>1,2</sup>, Kunlin Wang<sup>1</sup>, Dehai Wu<sup>5</sup>, Hu Jin<sup>6</sup>, Zhihong Li<sup>2,7\*</sup>, Hongwei Zhu<sup>1,2\*</sup>

<sup>1</sup>School of Materials Science and Engineering, State Key Laboratory of New Ceramics and Fine Processing, Key Laboratory of Materials Processing Technology of MOE, Tsinghua University, Beijing 100084, China

<sup>2</sup>Center for Nano and Micro Mechanics, Tsinghua University, Beijing 100084, China

<sup>3</sup>Department of Physics, Nanoscience and Nanotechnology Laboratory, Institute for Advanced Study, Nanchang University, Nanchang 330031, China

<sup>4</sup>National Center for Nanoscience and Technology, Zhongguancun, Beijing 100190, China

<sup>5</sup>Department of Mechanical Engineering, Tsinghua University, Beijing 100084, China

<sup>6</sup>2D Carbon Graphene Material Co., Ltd., Changzhou, Jiangsu 213149, China

<sup>7</sup>National Key Laboratory of Science and Technology on Micro/Nano Fabrication, Institute of Microelectronics, Peking University, Beijing 100871, China

### **The Electronic Supplementary Information includes:**

Figures S1~S4

Supplementary Movies S1~S3

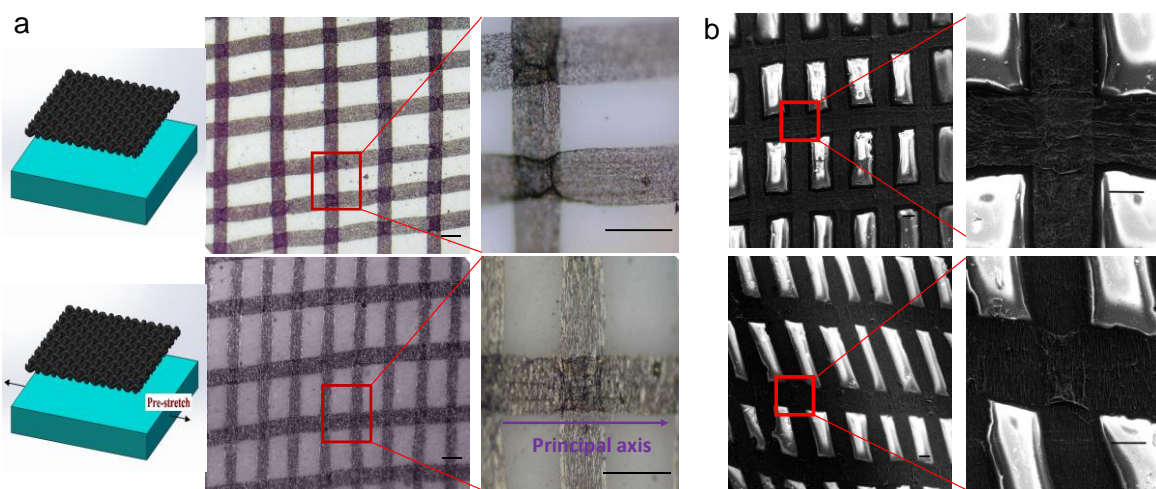

**Figure S1.** Characterizations of GWFs-on-PDMS film, illustrating the ordered parallel wavy microstructure of pre-strained GWFs. (a) Top-view optical images of GWFs without pre-strain (upper) and with 10% pre-strain (bottom) along the principal axis, scale bars: 100 $\mu$ m. (b) Top-view SEM images of GWFs without pre-strain (upper) and with 10% pre-strain (bottom) along the principal axis, scale bars: 50 $\mu$ m.

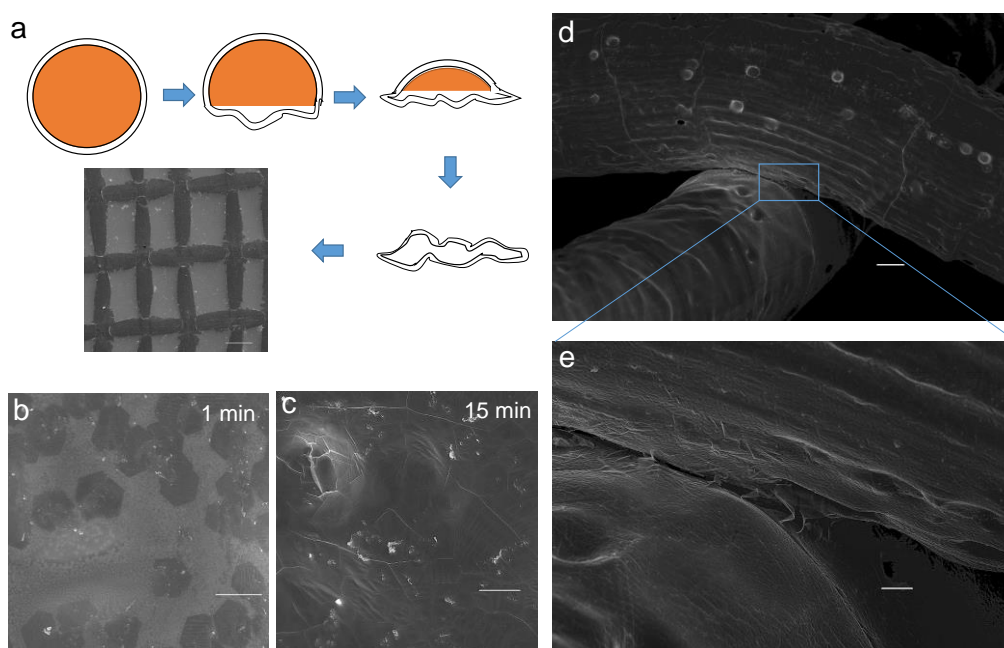

**Figure S2.** (a) Schematic diagram of the etching process of a copper wire. Characterizations of GWFs-on-copper mesh structure: (b) Multilayer islands nucleation grown for 1 min, scale bar: 2 $\mu$ m; (c) Islands grow (15 min) and finally interconnect into an integral film, scale bar: 2 $\mu$ m; (d) SEM image of copper wire cross-linking point after graphene growth, scale bar: 10 $\mu$ m; (e) Enlarged view SEM image of the region marked with a blue box, scale bar: 2 $\mu$ m.

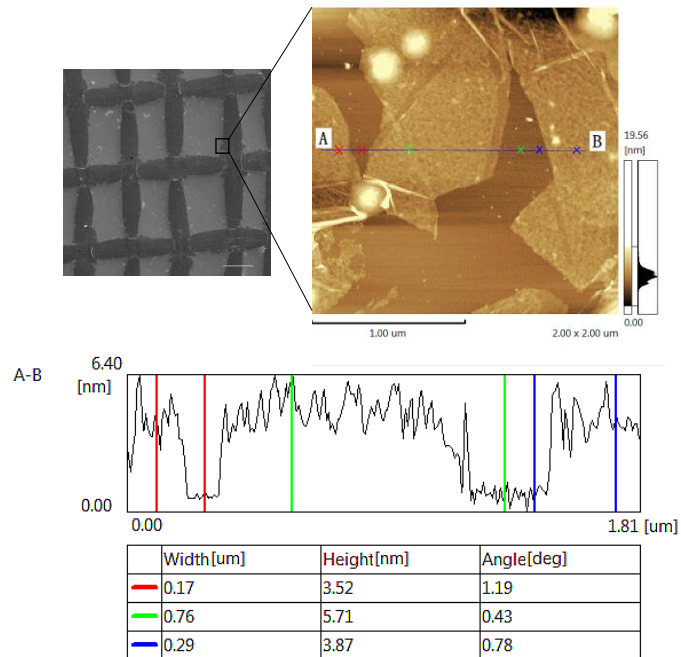

**Figure S3.** AFM characterization of the edge of the graphene micron-ribbon, demonstrating its nanometers thickness (3~7 nm).

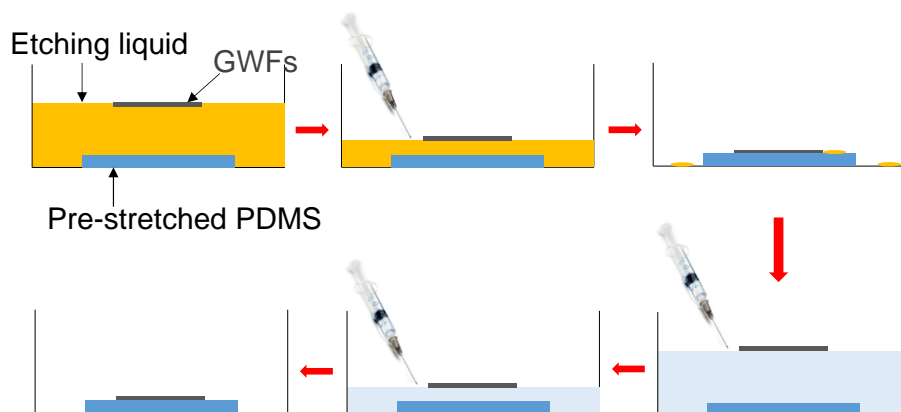

**Figure S4.** Schematic diagram of the transfer process.
